# Supplementary material
Source: Springer Nature journal article supplement (https://www.springermedizin.de/resource/supplementary/12889_2012_5247_MOESM1_ESM.pdf/9491436)
Supplement: MOESM1 [file 9491436]

**Preschools applying for gym lessons, fulfilling eligibility criteria**  
(preschool n=46)

**Not enrolled**  
(preschool n=7)  
refused to participate

**Enrolled with consent form**  
(preschool n= 39)

**Stratification** according to geographical location and SES  
**Randomization** into 2 study arms  
(preschool n= 39)

**Allocation to intervention (INT)**  
Received parent-focused intervention and state-sponsored gym lessons  
**preschool n=19; Mean cluster size: 23 (15-50)**  
  
Eligible children: N= 534  
**Children with informed consent: N=441 (83%)**

**Allocation**

**Allocation to Control (CONT)**  
Received state-sponsored gym lessons  
**preschool n=20; Mean cluster size: 19 (9-46)**  
  
Eligible children: N= 494  
**Children with informed consent: N=385 (80%)**

**Withdrew study consent**  
(n=1; N=8)  
Reasons: teacher disliked measurements

**Declined measurement**  
(n=1; N=9) Reasons: teacher disliked measurements

**Baseline measurements**  
preschool n=18, children N=433

**Baseline measurements**

**Baseline measurements**  
Preschool n=19; children N=376

**Analyzed (n=; N=)**

**Follow-up**

**Analysis**

**Analyzed (n=; N=)**
